Anesthesiology  
65:348, 1986

## Diazepam Depresses the Ventilatory Response to Carbon Dioxide

*To the Editor:*—In their recent article,<sup>1</sup> Bailey *et al.* once again raise the question of whether diazepam causes significant depression of the hypercarbic ventilatory response. In 1982, we used the dual isohypercapnic method to measure the time course of ventilatory depression after diazepam, 0.4 mg/kg iv, and found that the slope of the ventilatory response to hypercarbia was significantly depressed for at least 25 min.<sup>2</sup> In a second study,<sup>3</sup> we used Read's rebreathing method and found that diazepam, 0.4 mg/kg, reduces the slope of the ventilatory response to carbon dioxide from 2.41 to 1.30 l·min<sup>-1</sup>·mmHg<sup>-1</sup> ( $P < 0.001$ ) within 5 min.

Why, then, were Bailey and his colleagues unable to demonstrate this statistically and clinically significant depression of ventilatory drive? First, their diazepam dose (0.1 mg/kg) is relatively low for young, healthy volunteers. In fact, recommended doses for endoscopic procedures range from 0.15 to 0.3 mg/kg. Clearly, larger doses should be used in fit, young volunteers to predict the effect of clinical doses in elderly or frail patients, who may be more susceptible to diazepam's adverse effects.<sup>4</sup> A second consideration is the statistical analysis of the results. While the authors are to be commended for avoiding the "multiple *t*-test trap," their use of Bonferroni adjusted *t* tests may have been overly conservative. Indeed, had the authors used a more appropriate test, such as the Newman-Keuls or Dunnett's test, the *P* value for ventilatory depression at 5 min would almost certainly have decreased from 0.0508 to less than 0.05. Then, of course, the authors would have written a different paper: "Diazepam decreases the ventilatory response to carbon dioxide." This is but another example of "absence of evidence is not evidence of absence."<sup>5</sup>

Before the authors may state, "The results of this study demonstrate that diazepam, as a 0.1 mg/kg iv bolus, did not depress the ventilatory response to CO<sub>2</sub> . . .,"<sup>1</sup> they must perform a power analysis to determine the probability of a type II error. Because such an analysis would certainly show that this probability is high (in view of the *P* value of 0.0508), I believe that Bailey's study is best interpreted as confirming our earlier findings of ventilatory depression after iv diazepam.

JEFFREY B. GROSS, M.D.

Department of Anesthesia (112)

Philadelphia Veterans Administration Medical Center

University and Woodland Avenues

Philadelphia, Pennsylvania 19104

## REFERENCES

1. Bailey PL, Andriano KP, Goldman M, Stanley TH, Pace NL: Variability of the respiratory response to diazepam. *ANESTHESIOLOGY* 64:460-465, 1986
2. Gross JB, Smith L, Smith TC: Time course of ventilatory response to carbon dioxide after intravenous diazepam. *ANESTHESIOLOGY* 57:18-21, 1982
3. Spaulding BC, Choi SD, Gross JB, Apfelbaum JL, Broderson H: The effect of physostigmine on diazepam-induced ventilatory depression: A double-blind study. *ANESTHESIOLOGY* 61:551-554, 1984
4. Kanto J, Maenpaa M, Mantyla R, Sellman R, Valovirta E: Effect of age on the pharmacokinetics of diazepam given in conjunction with spinal anesthesia. *ANESTHESIOLOGY* 51:154-159, 1979
5. Hartung J, Cottrell JE, Giffin JP: Absence of evidence is not evidence of absence. *ANESTHESIOLOGY* 58:298-300, 1983

(Accepted for publication June 9, 1986.)

Anesthesiology  
65:348-349, 1986

*In reply:*—Dr. Gross questions our findings and interpretation in the article, "Variability of the respiratory response to diazepam." He makes two suggestions in support of his contention that diazepam does depress the ventilatory response to carbon dioxide.

First, Dr. Gross suggests our dose (0.1 mg/kg) was too low and that larger doses (0.4 mg/kg) should be used. Our intention was not to study anesthetic induction doses of diazepam, but rather the sedative doses frequently used for local standby or regional anesthesia or as supplements

in general anesthesia. We, therefore, thought a study of the effects of 0.1 mg/kg to be clinically relevant. Nevertheless, others have also found that higher doses of diazepam (0.15 and 0.29 mg/kg iv) do not produce significant depression of the ventilatory response to CO<sub>2</sub>.<sup>1,2</sup> Interestingly, variability of response is also seen in some subjects in those studies.

Dr. Gross also questions our statistical approach. He is incorrect in his assumption that we used Bonferroni adjusted paired *t* tests as the basis for our statement that at



no time did diazepam produce statistically significant decreases in the ventilatory response to  $\text{CO}_2$ . As stated in "Materials and Methods," we used a form of multivariate analysis for repeated measures to show no change in the slope of  $\dot{V}_E/\text{PET}_{\text{CO}_2}$  after diazepam. That test statistic was  $F_{4, 20} = 1.6013$ ,  $P = 0.2129$ . As the joint hypothesis was not rejected, Bonferroni adjusted paired  $t$  tests were not used. The  $P$  value 0.0508 represents a simple  $t$  test without Bonferroni adjustment. Admittedly, this is not pointed out and has perhaps led Dr. Gross to misinterpret our findings. Therefore, contrary to what Dr. Gross suggests, the  $P$  value for ventilatory depression at 5 min should, if anything, be larger, not smaller. Therefore, we believe our conclusions and title should remain the same to emphasize the significant variability of the respiratory response to diazepam.

PETER LEE BAILEY, M.D.  
KIRK P. ANDRIANO, M.S.

Anesthesiology  
65:349-350, 1986

MICHAEL GOLDMAN, M.D.  
THEODORE H. STANLEY, M.D.  
NATHAN L. PACE, M.D.  
*Department of Anesthesiology and the Department of  
Medicine  
Division of Respiration  
Critical Care and Occupational Medicine  
University of Utah School of Medicine  
Salt Lake City, Utah 84132*

#### REFERENCES

1. Bourke DL, Rosenberg M, Allen PD: Physostigmine: Effectiveness as an antagonist of respiratory depression and psychomotor effects caused by morphine or diazepam. *ANESTHESIOLOGY* 61:523-528, 1984
2. Power SJ, Morgan M, Chakrabarti MK: Carbon dioxide response curves following midazolam and diazepam. *Br J Anaesth* 55: 837-841, 1983

(Accepted for publication June 9, 1986.)

### Partial Expiratory Limb Obstruction by a Foreign Body Abutting upon an Ohio® 5400 Volume Monitor Sensor

*To the Editor:*—Obstruction of the expiratory limb of an anesthetic circuit is a rare but potentially lethal occurrence. Such obstructions are associated with incomplete pre-use circuit checking,<sup>1</sup> inappropriate circuit assembly,<sup>1,2</sup> the presence of a foreign body,<sup>1,3-6</sup> or anesthetic apparatus placed in the expiratory limb.<sup>1,7</sup> We wish to describe an episode of expiratory limb obstruction by an accidentally created foreign body abutting upon an Ohio® 5400 Volume Monitor Sensor.

An otherwise healthy patient was to undergo mediastinal node biopsy under general anesthesia. Prior to induction, an Ohmeda Modulus® II anesthetic circuit and ventilator, assembled by a previous operator, were tested for leaks and alarm function *via* thumb occlusion of the patient connector with the mask attached. Both inspiratory and expiratory valves had appropriate movement with positive pressure, and both nitrous oxide and oxygen flow meters demonstrated flow. After induction adequate positive pressure ventilation *via* mask was obtained with no inspiratory or expiratory obstruction noted. Following tracheal intubation, breath sounds were equal bilaterally with manual ventilation. Subsequently, the ventilator was engaged, whereupon 10–15  $\text{cmH}_2\text{O}$  of positive pressure was noted in the circuit during the expiratory phase. The expiratory limb was immediately disconnected from the Ohio® 5400 Volume Monitor Sensor. A disc of clear plas-

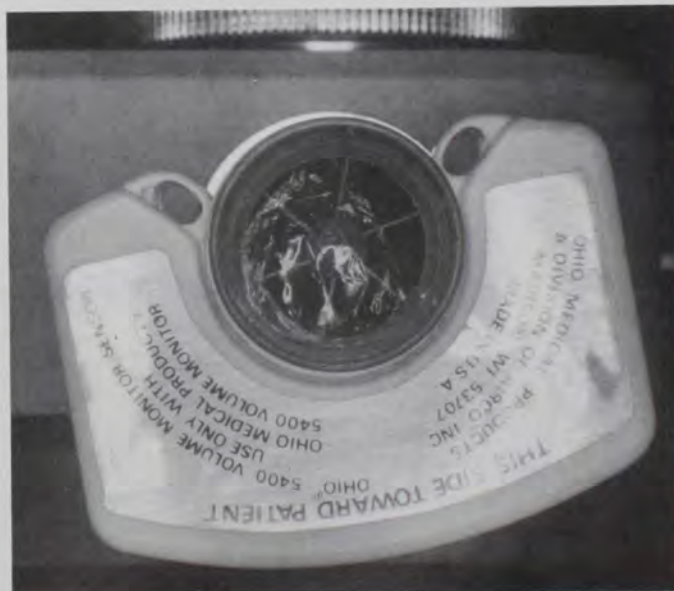

FIG. 1. Plastic disc abutting upon volume monitor sensor in expiratory limb.

tic was seen partially obstructing the expiratory limb, abutting upon the patient side of the volume monitor sensor (fig. 1). It was removed, and the circuit was reassembled, with no further expiratory obstruction being present.
